# Supplementary material for: Taxonomic and Phylogenetic Studies of Saprobic Fungi Associated with Mangifera indica in Yunnan, China
Source: MDPI journal article supplement (doi:10.3390/jof9060680), 2023-06-16
Supplement: s1 [file s1]

## Supplementary materials

Table S1. The names, isolate numbers, and corresponding GenBank accession numbers of the taxa used in Figure 1. The taxa produced in this study are indicated in red, and the type strains are indicated in bold with “\*”.

| Species                                        | Isolate No.             | GenBank accession No. |                 |                 |                 |
|------------------------------------------------|-------------------------|-----------------------|-----------------|-----------------|-----------------|
|                                                |                         | LSU                   | ITS             | <i>tef1-a</i>   | <i>rpb2</i>     |
| <i>Acremoniisimulans hongheensis</i>           | <b>HKAS 122669 *</b>    | <b>OQ379416</b>       | <b>OQ379005</b> | <b>OQ378995</b> | <b>OQ378988</b> |
| <i>Acremoniisimulans hongheensis</i>           | HKAS 122670             | OQ379417              | OQ379006        | OQ378996        | OQ378989        |
| <i>Acremoniisimulans thailandensis</i>         | <b>MFLU 18-0012 *</b>   | <b>MH260315</b>       | <b>MH275081</b> | /               | /               |
| <i>Acremonjisimulans cocois</i>                | <b>MFLUCC 15-0817 *</b> | <b>ON650672</b>       | <b>ON650683</b> | /               | /               |
| <i>Acrostalagmus annulatus</i>                 | CBS 121.84              | LR025802              | LR026673        | LR026374        | LR026104        |
| <i>Acrostalagmus annulatus</i>                 | CBS 185.70              | LR025803              | LR026674        | LR026375        | LR026105        |
| <i>Acrostalagmus annulatus</i>                 | CBS 450.85              | LR025804              | LR026675        | LR026376        | LR026106        |
| <i>Acrostalagmus luteoalbus</i>                | CBS 112.16              | LR025797              | LR026668        | LR026369        | LR026101        |
| <i>Acrostalagmus luteoalbus</i>                | CBS 222.60              | LR025794              | LR026665        | LR026366        | LR026099        |
| <i>Acrostalagmus luteoalbus</i>                | CBS 236.55              | LR025798              | LR026669        | LR026370        | LR026102        |
| <b><i>Brunneochlamydosporium cibotii</i></b>   | <b>CBS 109240 *</b>     | <b>LR025807</b>       | <b>LR026678</b> | <b>LR026380</b> | /               |
| <i>Brunneochlamydosporium macroclavatum</i>    | CBS 373.93              | LR025809              | LR026680        | LR026382        | LR026109        |
| <i>Brunneochlamydosporium macroclavatum</i>    | CBS 823.73              | LR025810              | LR026681        | LR026383        | LR026110        |
| <i>Brunneochlamydosporium macroclavatum</i>    | CBS 101249              | LR025811              | LR026682        | LR026384        | /               |
| <b><i>Brunneochlamydosporium nepalense</i></b> | <b>CBS 971.72 *</b>     | <b>LR025813</b>       | <b>LR026684</b> | <b>LR026386</b> | <b>LR026112</b> |
| <i>Brunneochlamydosporium nepalense</i>        | CBS 112045              | LR025814              | LR026685        | LR026387        | LR026113        |
| <i>Brunneochlamydosporium terrestre</i>        | CBS 112777              | LR025819              | LR026690        | LR026392        | LR026118        |
| <b><i>Brunneomyces brunnescens</i></b>         | <b>CBS 559.73 *</b>     | <b>HQ231966</b>       | <b>LN810520</b> | <b>LN810534</b> | <b>LR026119</b> |

|                                           |                     |                 |                 |                 |                 |
|-------------------------------------------|---------------------|-----------------|-----------------|-----------------|-----------------|
| <i>Brunneomyces europaeus</i>             | CBS 560.86          | LN810511        | LN810518        | LN810537        | LN810527        |
| <b><i>Brunneomyces europaeus</i></b>      | <b>CBS 652.96 *</b> | <b>LN810512</b> | <b>LN810519</b> | <b>LN810538</b> | <b>LN810528</b> |
| <b><i>Brunneomyces hominis</i></b>        | <b>FMR 10429 *</b>  | <b>LN810509</b> | <b>KP131517</b> | <b>LN810535</b> | /               |
| <i>Chlamydosporiella restricta</i>        | CBS 119.97          | LR025820        | LR026691        | LR026393        | LR026120        |
| <i>Chlamydosporiella restricta</i>        | CBS 177.40          | LR025821        | LR026692        | LR026394        | LR026121        |
| <b><i>Chlamydosporiella restricta</i></b> | <b>CBS 178.40 *</b> | <b>LR025822</b> | <b>LR026693</b> | <b>LR026395</b> | <b>LR026122</b> |
| <i>Chlamydosporiella restricta</i>        | CBS 434.83          | LR025823        | LR026694        | LR026396        | LR026123        |
| <i>Chlamydosporiella restricta</i>        | CBS 443.66          | LR025824        | LR026695        | LR026397        | LR026124        |
| <i>Chlamydosporiella restricta</i>        | CBS 716.88          | LR025825        | LR026696        | LR026398        | LR026125        |
| <i>Chlamydosporiella restricta</i>        | CBS 988.69          | LR025826        | LR026697        | LR026399        | /               |
| <b><i>Chordomyces albus</i></b>           | <b>CBS 987.87 *</b> | <b>JX158444</b> | <b>DQ825970</b> | <b>JX158400</b> | <b>JX158466</b> |
| <i>Chordomyces albus</i>                  | CBS 206.70          | LR025829        | LR026700        | LR026402        | LR026128        |
| <i>Chordomyces albus</i>                  | CBS 299.70E         | LR025830        | LR026701        | LR026403        | LR026129        |
| <i>Chordomyces albus</i>                  | CBS 204.70          | LR025827        | LR026698        | LR026400        | LR026126        |
| <i>Chordomyces albus</i>                  | CBS 205.70          | LR025828        | LR026699        | LR026401        | LR026127        |
| <i>Chordomyces antarcticus</i>            | CBS 120042          | KJ443108        | KJ443240        | KJ443196        | KJ443156        |
| <b><i>Chordomyces antarcticus</i></b>     | <b>CBS 120045 *</b> | KJ443109        | KJ443241        | KJ443197        | KJ443157        |
| <i>Chordomyces antarcticus</i>            | CBS 120046          | KJ443110        | KJ443242        | KJ443198        | KJ443158        |
| <i>Furcasterigmium furcatum</i>           | CBS 116548          | LR025842        | LR026712        | LR026409        | LR026134        |
| <i>Furcasterigmium furcatum</i>           | CBS 116550          | LR025843        | LR026713        | LR026410        | LR026135        |
| <b><i>Furcasterigmium furcatum</i></b>    | <b>CBS 122.42 *</b> | <b>LR025838</b> | <b>LR026709</b> | <b>LR026408</b> | <b>LR026133</b> |
| <i>Fuscohypha expansa</i>                 | CBS 103.95          | LR025844        | LR026714        | LR026411        | /               |
| <b><i>Fuscohypha expansa</i></b>          | <b>CBS 418.89 *</b> | <b>LR025845</b> | <b>LR026715</b> | <b>LR026412</b> | <b>LR026136</b> |
| <b><i>Gibellulopsis aquatica</i></b>      | <b>CBS 117131 *</b> | <b>LR025850</b> | <b>LR026720</b> | <b>LR026414</b> | /               |
| <i>Gibellulopsis capsici</i>              | CBS 175.75          | LR025871        | LR026741        | LR026432        | LR026152        |

|                                           |                        |                  |                  |                 |                 |
|-------------------------------------------|------------------------|------------------|------------------|-----------------|-----------------|
| <b><i>Gibellulopsis capsici</i></b>       | <b>CBS 290.30 *</b>    | <b>LR025872</b>  | <b>LR026742</b>  | <b>LR026433</b> | <b>/</b>        |
| <i>Gibellulopsis capsici</i>              | CBS 345.39             | LR025873         | LR026743         | LR026434        | LR026153        |
| <i>Gibellulopsis capsici</i>              | CBS 565.78C            | LR025884         | LR026754         | LR026444        | LR026158        |
| <i>Gibellulopsis capsici</i>              | CBS 892.70             | LR025885         | LR026755         | LR026445        | LR026159        |
| <i>Gibellulopsis capsici</i>              | CBS 100826             | LR025886         | LR026756         | LR026446        | LR026160        |
| <i>Gibellulopsis capsici</i>              | CBS 100827             | LR025887         | LR026757         | LR026447        | LR026161        |
| <b><i>Gibellulopsis catenata</i></b>      | <b>CBS 113951 *</b>    | <b>LR025851</b>  | <b>LR026721</b>  | <b>LR026415</b> | <b>LR026137</b> |
| <i>Gibellulopsis fusca</i>                | CBS 308.38             | LR025852         | LR026722         | LR026416        | LR026138        |
| <i>Gibellulopsis fusca</i>                | CBS 402.80             | LR025853         | LR026723         | LR026417        | LR026139        |
| <b><i>Gibellulopsis fusca</i></b>         | <b>CBS 560.65 *</b>    | <b>LR025854</b>  | <b>LR026724</b>  | <b>LR026418</b> | <b>LR026140</b> |
| <b><i>Gibellulopsis nigrescens</i></b>    | <b>CBS 120949 *</b>    | <b>NG_067330</b> | <b>NR_149327</b> | <b>LR026429</b> | <b>LR026149</b> |
| <i>Gibellulopsis nigrescens</i>           | CBS 123176             | LR025869         | LR026739         | LR026430        | LR026150        |
| <b><i>Lectera capsici</i></b>             | <b>CBS 142534 *</b>    | <b>KY979825</b>  | <b>KY979770</b>  | <b>LR026454</b> | <b>LR026166</b> |
| <i>Lectera colletotrichoides</i>          | IMI 303685             | LR025894         | JQ647450         | LR026455        | LR026167        |
| <i>Lectera colletotrichoides</i>          | IMI 332702             | LR025895         | JQ647428         | LR026456        | LR026168        |
| <i>Lectera colletotrichoides</i>          | IMI 265740             | LR025896         | JQ647449         | LR026457        | LR026169        |
| <b><i>Lectera longa</i></b>               | <b>IMI 181698 *</b>    | <b>LR025897</b>  | <b>JQ647448</b>  | <b>LR026458</b> | <b>LR026170</b> |
| <i>Lectera phaseoli</i>                   | IMI 366179             | LR025898         | JQ693168         | LR026459        | LR026171        |
| <b><i>Longitudinalis nabanheensis</i></b> | <b>KUMCC 16-0145 *</b> | <b>NG_068250</b> | <b>KY882037</b>  | <b>KY882040</b> | <b>/</b>        |
| <i>Monilochaetes infuscans</i>            | CBS 379.77             | GU180645         | LR026764         | LR026460        | GU180658        |
| <b><i>Monilochaetes infuscans</i></b>     | <b>CBS 869.96 *</b>    | <b>GU180639</b>  | <b>GU180626</b>  | <b>LR026461</b> | <b>GU180657</b> |
| <b><i>Musicillium elettariae</i></b>      | <b>CBS 252.80 *</b>    | <b>LR025899</b>  | <b>LR026765</b>  | <b>LR026462</b> | <b>LR026172</b> |
| <i>Musicillium elettariae</i>             | CBS 110322             | LR025900         | LR026766         | LR026463        | /               |
| <i>Musicillium elettariae</i>             | CBS 140681             | LR025901         | LR026767         | LR026464        | LR026173        |
| <i>Musicillium theobromae</i>             | CBS 360.76             | LR025904         | LR026770         | LR026465        | LR026175        |

|                                              |                      |                 |                 |                 |                 |
|----------------------------------------------|----------------------|-----------------|-----------------|-----------------|-----------------|
| <i>Musicillium theobromae</i>                | CBS 385.32           | LR025905        | LR026771        | LR026466        | LR026176        |
| <i>Musicillium theobromae</i>                | CBS 397.58           | LR025906        | LR026772        | LR026467        | LR026177        |
| <i>Musicillium tropicale</i>                 | CBS 458.51           | LR025915        | LR026781        | LR026475        | LR026184        |
| <i>Musicillium tropicale</i>                 | CBS 100951           | LR025916        | LR026782        | LR026476        | LR026185        |
| <b><i>Musicillium tropicale</i></b>          | <b>CBS 120009 *</b>  | <b>LR025917</b> | <b>LR026783</b> | <b>LR026477</b> | <b>LR026186</b> |
| <b><i>Musidium stromaticum</i></b>           | <b>CBS 863.73 *</b>  | <b>HQ232143</b> | <b>DQ825969</b> | <b>LN810533</b> | <b>/</b>        |
| <i>Musidium stromaticum</i>                  | CBS 132.74           | LR025919        | LR026785        | LR026479        | LR026187        |
| <i>Musidium stromaticum</i>                  | CBS 133.74           | LR025920        | LR026786        | LR026480        | LR026188        |
| <i>Musidium stromaticum</i>                  | CBS 135.74A          | LR025922        | LR026787        | LR026482        | LR026189        |
| <i>Nigrocephalum collariferum</i>            | CBS 124585           | LR025928        | FJ765365        | LR026485        | LR026192        |
| <b><i>Nigrocephalum collariferum</i></b>     | <b>CBS 124586 *</b>  | <b>LR025929</b> | <b>FJ765367</b> | <b>LR026486</b> | <b>LR026193</b> |
| <b><i>Paragibellulopsis chrysanthemi</i></b> | <b>MAFF 242621 *</b> | <b>KC287230</b> | <b>KC287235</b> | <b>KC287232</b> | <b>/</b>        |
| <i>Paragibellulopsis chrysanthemi</i>        | MAFF 243429          | KC287229        | KC287234        | KC287231        | /               |
| <i>Paragibellulopsis chrysanthemi</i>        | MAFF 243430          | KC287228        | KC287233        | /               | /               |
| <b><i>Paramusicillium asperulatum</i></b>    | <b>CBS 120158 *</b>  | <b>LR025930</b> | <b>LR026792</b> | <b>LR026487</b> | <b>LR026194</b> |
| <b><i>Phialoparvum bifurcatum</i></b>        | <b>CBS 299.70B *</b> | <b>LR025931</b> | <b>LR026793</b> | <b>LR026488</b> | <b>LR026195</b> |
| <i>Plectosphaerella alismatis</i>            | CBS 113362           | LR025932        | LR026794        | LR026489        | LR026196        |
| <i>Plectosphaerella citrullae</i>            | CBS 131740           | LR025933        | LR026795        | LR026490        | /               |
| <b><i>Plectosphaerella citrullae</i></b>     | <b>CBS 131741 *</b>  | <b>LR025934</b> | <b>LR026796</b> | <b>LR026491</b> | <b>LR026197</b> |
| <b><i>Plectosphaerella cucumerina</i></b>    | <b>CBS 137.37 *</b>  | <b>LR025936</b> | <b>LR026798</b> | <b>LR026493</b> | <b>LR026199</b> |
| <i>Plectosphaerella cucumerina</i>           | CBS 139.60           | LR025937        | LR026799        | LR026494        | LR026200        |
| <i>Plectosphaerella cucumerina</i>           | CBS 286.64           | LR025938        | LR026800        | LR026495        | LR026201        |
| <b><i>Plectosphaerella delsorboi</i></b>     | <b>CBS 116708 *</b>  | <b>LR025948</b> | <b>LR026810</b> | <b>LR026505</b> | <b>LR026209</b> |
| <b><i>Plectosphaerella humicola</i></b>      | <b>CBS 423.66 *</b>  | <b>LR025949</b> | <b>LR026811</b> | <b>LR026506</b> | <b>LR026210</b> |
| <b><i>Plectosphaerella melonis</i></b>       | <b>CBS 489.96T *</b> | <b>LR025950</b> | <b>LR026812</b> | <b>LR026507</b> | <b>/</b>        |

|                                       |                     |                 |                  |                 |                 |
|---------------------------------------|---------------------|-----------------|------------------|-----------------|-----------------|
| <i>Plectosphaerella oligotrophica</i> | CBS 440.90          | LR025952        | LR026814         | LR026509        | LR026211        |
| <i>Plectosphaerella pauciseptata</i>  | CBS 131745          | LR025954        | LR026816         | LR026511        | LR026212        |
| <i>Plectosphaerella plurivora</i>     | <b>CBS 131742 *</b> | <b>LR025967</b> | <b>LR026829</b>  | <b>LR026524</b> | <b>LR026219</b> |
| <i>Plectosphaerella populi</i>        | <b>CBS 139623 *</b> | <b>KR476783</b> | <b>KR476750</b>  | <b>LR026527</b> | <b>LR026222</b> |
| <i>Plectosphaerella ramiseptata</i>   | <b>CBS 131861 *</b> | <b>LR025970</b> | <b>LR026832</b>  | <b>LR026530</b> | <b>LR026225</b> |
| <i>Plectosphaerella sinensis</i>      | <b>ACCC 39145 *</b> | <b>KX527891</b> | <b>KX527888</b>  | /               | /               |
| <i>Sayamraella subula</i>             | <b>BCC 78964 *</b>  | <b>LR025971</b> | <b>LR026833</b>  | <b>LR026531</b> | <b>LR026226</b> |
| <i>Sodiomyces alcalophilus</i>        | <b>CBS 114.92 *</b> | <b>JX158443</b> | <b>JX158421</b>  | <b>JX158399</b> | <b>JX158465</b> |
| <i>Sodiomyces alkalinus</i>           | <b>CBS 110278 *</b> | <b>JX158427</b> | <b>NR_145378</b> | <b>JX158383</b> | <b>JX158449</b> |
| <i>Sodiomyces magadii</i>             | <b>CBS 137619 *</b> | <b>KJ443148</b> | <b>KJ443278</b>  | /               | /               |
| <i>Sodiomyces tronii</i>              | <b>CBS 137618 *</b> | <b>KJ443147</b> | <b>KJ443277</b>  | /               | /               |
| <i>Stachylidium bicolor</i>           | <b>CBS 121802 *</b> | <b>LR025972</b> | <b>LR026834</b>  | <b>LR026532</b> | /               |
| <i>Stachylidium pallidum</i>          | BCC 79031           | LR025973        | LR026835         | LR026533        | LR026227        |
| <i>Summerbellia oligotrophica</i>     | CBS 299.70G         | LR025846        | LR026716         | LR026413        | /               |
| <i>Theobromium fuscum</i>             | <b>CBS 112271 *</b> | <b>LR025976</b> | <b>LR026839</b>  | <b>LR026535</b> | <b>LR026229</b> |
| <i>Verticillium albo-atrum</i>        | CBS 388.82          | LR025978        | LR026841         | LR026537        | LR026231        |
| <i>Verticillium albo-atrum</i>        | <b>CBS 130340 *</b> | <b>LR025984</b> | <b>LR026847</b>  | <b>LR026543</b> | <b>LR026233</b> |
| <i>Verticillium alfalfae</i>          | <b>CBS 130603 *</b> | <b>LR025988</b> | <b>LR026851</b>  | <b>LR026547</b> | <b>LR026236</b> |
| <i>Verticillium dahliae</i>           | CBS 179.66          | LR025992        | LR026854         | LR026549        | LR026238        |
| <i>Verticillium isaacii</i>           | CBS 100839          | LR026034        | LR026895         | LR026575        | LR026258        |
| <i>Verticillium isaacii</i>           | <b>CBS 130343 *</b> | <b>LR026038</b> | <b>LR026899</b>  | <b>LR026577</b> | /               |
| <i>Verticillium klebahnii</i>         | <b>CBS 130344 *</b> | <b>LR026039</b> | <b>LR026900</b>  | <b>LR026578</b> | /               |
| <i>Verticillium longisporum</i>       | <b>CBS 124.64 *</b> | <b>LR026040</b> | <b>LR026901</b>  | /               | /               |
| <i>Verticillium nonalfalfae</i>       | <b>CBS 130339 *</b> | <b>LR026074</b> | <b>LR026935</b>  | <b>LR026590</b> | /               |
| <i>Verticillium nonalfalfae</i>       | CBS 454.51          | LR026070        | LR026931         | LR026586        | LR026279        |

|                                        |                         |                  |                  |                 |                 |
|----------------------------------------|-------------------------|------------------|------------------|-----------------|-----------------|
| <i>Verticillium nubilum</i>            | <b>CBS 457.51 *</b>     | <b>LR026076</b>  | <b>LR026937</b>  | <b>LR026591</b> | <b>LR026282</b> |
| <i>Verticillium tricorpus</i>          | <b>CBS 447.54 *</b>     | <b>LR026083</b>  | <b>LR026944</b>  | /               | /               |
| <i>Verticillium tricorpus</i>          | CBS 545.79              | LR026084         | LR026945         | LR026597        | LR026284        |
| <i>Verticillium tricorpus</i>          | CBS 803.97              | LR026085         | LR026946         | LR026598        | LR026285        |
| <i>Verticillium zaregamsianum</i>      | <b>CBS 130342 *</b>     | <b>LR026098</b>  | <b>LR026959</b>  | <b>LR026610</b> | /               |
| <i>Verticillium zaregamsianum</i>      | CBS 100842              | LR026097         | LR026958         | LR026609        | /               |
| <i>Xenoplectosphaerella clematidis</i> | <b>MFLUCC 17-2067 *</b> | <b>NG_071256</b> | <b>NR_172181</b> | <b>MT394674</b> | <b>MT394722</b> |

**Table S2.** The names, isolate numbers, and corresponding GenBank accession numbers of the taxa used in Figure 3. The taxa produced in this study are indicated in red, and the type strains are indicated in bold with “\*”.

| Species                             | Strain                 | GenBank accession No. |                 |               |             |
|-------------------------------------|------------------------|-----------------------|-----------------|---------------|-------------|
|                                     |                        | ITS                   | LSU             | <i>tef1-a</i> | <i>rpb2</i> |
| <i>Acanthohelicospora aurea</i>     | GZCC 16-0059           | KY321322              | KY321325        | KY792599      | MF589910    |
| <i>Acanthohelicospora scopula</i>   | MFLUCC10-0116          | KF301526              | KF301534        | KF301555      | /           |
| <i>Acanthohelicospora scopulum</i>  | ANM 386                | GQ856141              | GQ850489        | /             | /           |
| <i>Acanthohelicospora scopulum</i>  | ANM 95                 | GQ856142              | GQ850490        | /             | /           |
| <i>Acanthostigma Chiangmaiensis</i> | <b>MFLUCC10-0125 *</b> | <b>JN865209</b>       | <b>JN865197</b> | /             | /           |
| <i>Acanthostigma perpusillum</i>    | UAMH 7237              | AY916492              | AY856892        | /             | /           |
| <i>Acanthostigma minuta</i>         | ANM 818                | /                     | GQ850488        | /             | /           |
| <i>Acanthostigma minuta</i>         | ANM 238                | /                     | GQ850486        | /             | /           |
| <i>Acanthostigma multiseptatum</i>  | ANM 665                | GQ856144              | GQ850493        | /             | /           |

|                                             |                         |                  |                 |                 |                 |
|---------------------------------------------|-------------------------|------------------|-----------------|-----------------|-----------------|
| <i>Acanthostigma multiseptatum</i>          | ANM 475 *               | GQ856145         | GQ850492        | /               | /               |
| <i>Acanthotubeufia filiformis</i>           | ANM 101                 | /                | GQ850495        | /               | /               |
| <i>Acanthotubeufia filiformis</i>           | ANM 514                 | GQ856146         | GQ850494        | /               | /               |
| <i>Aquaphila albicans</i>                   | BCC 3520                | DQ341098         | DQ341102        | /               | /               |
| <i>Aquaphila albicans</i>                   | BCC 3543                | DQ341096         | DQ341101        | /               | /               |
| <i>Berkleasmium aquaticum</i>               | MFLUCC 17-0039          | KY790443         | KY790431        | KY792607        | MF535267        |
| <i>Berkleasmium aquaticum</i>               | GZCC 16-0056            | KY790442         | KY790430        | KY792606        | MF535266        |
| <b><i>Berkleasmium aquaticum</i></b>        | <b>MFLUCC 17-0049 *</b> | <b>KY790444</b>  | <b>KY790432</b> | <b>KY792608</b> | <b>MF535268</b> |
| <i>Berkleasmium brunneisporum</i>           | MFLUCC 16-1127          | KY790447         | KY790435        | KY792611        | MF535269        |
| <b><i>Berkleasmium brunneisporum</i></b>    | <b>MFLUCC 16-0015 *</b> | <b>KY790446</b>  | <b>KY790434</b> | <b>KY792610</b> | /               |
| <i>Berkleasmium concinnum</i>               | DAOM:696499             | KY611397         | KY611399        | /               | /               |
| <i>Berkleasmium fusiforme</i>               | MFLUCC 17-1988          | MH558696         | MH558823        | MH550887        | MH551010        |
| <b><i>Berkleasmium guangxiense</i></b>      | <b>MFLUCC 17-0042 *</b> | <b>KY790448</b>  | <b>KY790436</b> | <b>KY792612</b> | <b>MF535270</b> |
| <b><i>Berkleasmium latisporum</i></b>       | <b>MFLUCC 16-0019 *</b> | <b>KY790449</b>  | <b>KY790437</b> | <b>KY792613</b> | <b>MF535271</b> |
| <i>Berkleasmium longisporum</i>             | MFLUCC 17-2002          | MH558699         | MH558826        | MH550890        | MH551013        |
| <b><i>Berkleasmium longisporum</i></b>      | <b>MFLUCC 17-1999 *</b> | <b>MH558698</b>  | <b>MH558825</b> | <b>MH550889</b> | <b>MH551012</b> |
| <i>Berkleasmium thailandicum</i>            | MFLUCC 17-1984          | MH558700         | MH558827        | MH550891        | MH551015        |
| <i>Berkleasmium thailandicum</i>            | MFLUCC 17-2000          | MH558701         | MH558828        | MH550892        | MH551016        |
| <i>Boerlagiomyces macrospora</i>            | MFLUCC 12-0388          | KU144927         | KU764712        | KU872750        | /               |
| <b><i>Botryosphaeria pseudoramosa</i></b>   | <b>CERC 2001 *</b>      | <b>KX277989</b>  | <b>MF410031</b> | /               | <b>MF410140</b> |
| <b><i>Botryosphaeria wangensis</i></b>      | <b>CERC 2298 *</b>      | <b>KX278002</b>  | <b>MF410044</b> | /               | <b>MF410153</b> |
| <b><i>Camporesiomyces mali</i></b>          | <b>KUMCC 19-0216 *</b>  | <b>MN792813</b>  | <b>MN792811</b> | <b>MN794018</b> | /               |
| <b><i>Camporesiomyces patagoniensis</i></b> | <b>BBB:MVB 573 *</b>    | <b>NG_056997</b> | <b>JN127359</b> | /               | /               |
| <b><i>Camporesiomyces vaccinii</i></b>      | <b>CBS:216.90 *</b>     | <b>MH862204</b>  | <b>MH873889</b> | /               | /               |
| <i>Camporesiomyces vaccinii</i>             | CBS 216.91              | AY916486         | AY856879        | /               | /               |

|                                              |                         |                  |                  |                 |                 |
|----------------------------------------------|-------------------------|------------------|------------------|-----------------|-----------------|
| <b><i>Chlamydotubeufia cylindrica</i></b>    | <b>MFLU 17-1177 *</b>   | <b>NR_159761</b> | <b>NG_066230</b> | <b>MH550893</b> | <b>MH551018</b> |
| <i>Chlamydotubeufia huaikangplaensis</i>     | MFLUCC 16-0227          | KY678765         | KY678757         | KY792596        | MF535260        |
| <i>Chlamydotubeufia huaikangplaensis</i>     | MFLUCC 16-0023          | KY678766         | KY678758         | KY792597        | MF535259        |
| <b><i>Chlamydotubeufia krabiensis</i></b>    | <b>MFLUCC 16-1134 *</b> | <b>KY678767</b>  | <b>KY678759</b>  | <b>KY792598</b> | <b>MF535261</b> |
| <i>Dematiohelicoma pulchrum</i>              | MUCL 39827              | AY916457         | AY856872         | /               | /               |
| <i>Dematiohelicomycetes helicosporus</i>     | MFLUCC 16-0007          | MH558704         | MH558832         | MH550895        | MH551020        |
| <i>Dematiohelicomycetes helicosporus</i>     | MFLUCC 16-0003          | MH558703         | MH558831         | MH550894        | MH551019        |
| <b><i>Dematiohelicosporum guttulatum</i></b> | <b>MFLUCC 17-2011 *</b> | <b>MH558705</b>  | <b>MH558833</b>  | <b>MH550896</b> | <b>MH551021</b> |
| <i>Dematitubeufia chiangraiensis</i>         | MFLU 10-0048            | /                | /                | KF301551        | /               |
| <b><i>Dictyospora thailandica</i></b>        | <b>MFLUCC 16-0001 *</b> | <b>KY873627</b>  | <b>KY873622</b>  | <b>KY873286</b> | <b>MH551023</b> |
| <i>Dictyospora thailandica</i>               | MFLUCC 18-0641          | MH558706         | MH558834         | MH550897        | MH551022        |
| <b><i>Discotubeufia browneae</i></b>         | <b>MFLUCC 17-0908 *</b> | <b>NR_163321</b> | <b>MK347938</b>  | <b>/</b>        | <b>MK434903</b> |
| <i>Excipulariopsis narsapurensis</i>         | KUMCC 21-0464           | OQ379007         | OQ379418         | OQ378997        | OQ378990        |
| <i>Excipulariopsis narsapurensis</i>         | KUMCC 21-0465           | OQ379008         | OQ379419         | OQ378998        | OQ378991        |
| <i>Helicangiospora lignicola</i>             | MFLUCC 11-0378          | KF301523         | KF301531         | KF301552        | /               |
| <b><i>Helicoarctatus aquaticus</i></b>       | <b>MFLUCC 17-1996 *</b> | <b>MH558707</b>  | <b>MH558835</b>  | <b>MH550898</b> | <b>MH551024</b> |
| <b><i>Helicodochium aquaticum</i></b>        | <b>MFLUCC 17-2016 *</b> | <b>MH558709</b>  | <b>MH558837</b>  | <b>MH550900</b> | <b>MH551026</b> |
| <i>Helicodochium aquaticum</i>               | MFLUCC 18-0490          | MH558710         | MH558838         | MH550901        | MH551027        |
| <i>Helicohyalinum aquaticum</i>              | MFLUCC 16-0014          | MH558711         | MH558839         | MH550902        | MH551028        |
| <b><i>Helicohyalinum aquaticum</i></b>       | <b>MFLUCC 16-1131 *</b> | <b>KY873625</b>  | <b>NG_070412</b> | <b>KY873284</b> | <b>MF535257</b> |
| <b><i>Helicohyalinum infundibulum</i></b>    | <b>MFLUCC 16-1133 *</b> | <b>MH558712</b>  | <b>MH558840</b>  | <b>MH550903</b> | <b>MH551029</b> |
| <b><i>Helicoma aquaticum</i></b>             | <b>MFLUCC 17-2025 *</b> | <b>MH558713</b>  | <b>MH558841</b>  | <b>MH550904</b> | <b>MH551030</b> |
| <b><i>Helicoma brunneisporum</i></b>         | <b>MFLUCC 17-1983 *</b> | <b>MH558714</b>  | <b>MH558842</b>  | <b>MH550905</b> | <b>MH551031</b> |
| <i>Helicoma guttulatum</i>                   | MFLUCC 16-0022          | KX454171         | KX454172         | MF535254        | MH551032        |
| <b><i>Helicoma hongkongense</i></b>          | <b>MFLUCC 17-2005 *</b> | <b>MH558716</b>  | <b>MH558843</b>  | <b>MH550907</b> | <b>MH551033</b> |



|                                            |                         |                  |                 |                 |                 |
|--------------------------------------------|-------------------------|------------------|-----------------|-----------------|-----------------|
| <i>Helicoma longisporum</i>                | MFLUCC 16-0211          | MH558719         | MH558845        | MH550910        | MH551036        |
| <i>Helicoma nematosporum</i>               | MFLUCC 16-0011          | MH558722         | MH558848        | MH550913        | MH551039        |
| <b><i>Helicoma rubriappendiculatum</i></b> | <b>MFLUCC 18-0491 *</b> | <b>MH558723</b>  | <b>MH558849</b> | <b>MH550914</b> | <b>MH551040</b> |
| <b><i>Helicoma rufum</i></b>               | <b>MFLUCC 17-1806 *</b> | <b>MH558724</b>  | <b>MH558850</b> | <b>MH550915</b> | /               |
| <b><i>Helicoma septoconstrictum</i></b>    | <b>MFLUCC 17-2001 *</b> | <b>MH558726</b>  | <b>MH558852</b> | <b>MH550917</b> | <b>MH551042</b> |
| <i>Helicoma septoconstrictum</i>           | MFLUCC 17-1991          | MH558725         | MH558851        | MH550916        | MH551041        |
| <i>Helicoma siamense</i>                   | MFLUCC 12-0563          | KU144928         | KU764713        | KU872751        | /               |
| <b><i>Helicomycetes colligatus</i></b>     | <b>MFLUCC 16-1132 *</b> | <b>MH558727</b>  | <b>MH558853</b> | <b>MH550918</b> | <b>MH551043</b> |
| <b><i>Helicomycetes hyalosporus</i></b>    | <b>MFLUCC 17-0051 *</b> | <b>MH558731</b>  | <b>MH558857</b> | <b>MH550922</b> | <b>MH551047</b> |
| <b><i>Helicomycetes torquatus</i></b>      | <b>MFLUCC 16-0217 *</b> | <b>MH558732</b>  | <b>MH558858</b> | <b>MH550923</b> | <b>MH551048</b> |
| <b><i>Helicosporium aquaticum</i></b>      | <b>MFLUCC 17-2008 *</b> | <b>NR_160371</b> | /               | <b>MH550924</b> | <b>MH551049</b> |
| <b><i>Helicosporium flavisporum</i></b>    | <b>MFLUCC 17-2020 *</b> | <b>MH558734</b>  | <b>MH558860</b> | <b>MH550925</b> | <b>MH551050</b> |
| <b><i>Helicosporium flavum</i></b>         | <b>MFLUCC 16-1230 *</b> | <b>KY873626</b>  | <b>KY873621</b> | <b>KY873285</b> | /               |
| <i>Helicosporium gracile</i>               | CBS 284.54              | MH857334         | MH868875        | /               | /               |
| <b><i>Helicosporium luteosporum</i></b>    | <b>MFLUCC 16-0226 *</b> | <b>KY321324</b>  | <b>KY321327</b> | <b>KY792601</b> | <b>MH551056</b> |
| <b><i>Helicosporium setiferum</i></b>      | <b>MFLUCC 17-1994 *</b> | <b>MH558735</b>  | <b>MH558861</b> | <b>MH550926</b> | <b>MH551051</b> |
| <i>Helicosporium setiferum</i>             | MFLUCC 17-2007          | MH558737         | MH558863        | MH550928        | MH551053        |
| <i>Helicosporium</i> sp.                   | NBRC 9014               | AY916489         | AY856903        | /               | /               |
| <i>Helicosporium vegetum</i>               | CBS 941.72              | AY916488         | AY856883        | /               | /               |
| <i>Helicosporium vesicarium</i>            | MFLUCC 17-1795          | MH558739         | MH558864        | MH550930        | MH551055        |
| <b><i>Helicosporium viridiflavum</i></b>   | <b>MFLUCC 17-2336 *</b> | <b>MH558738</b>  | /               | <b>MH550929</b> | <b>MH551054</b> |
| <i>Helicotruncatum palmigenum</i>          | MFLUCC 15-0993          | MT627685         | MN913690        | /               | /               |
| <b><i>Helicotubeufia guangxiensis</i></b>  | <b>MFLUCC 17-0040 *</b> | <b>MH290018</b>  | <b>MH290023</b> | <b>MH290028</b> | <b>MH290033</b> |
| <b><i>Helicotubeufia hydei</i></b>         | <b>MFLUCC 17-1980 *</b> | <b>MH290021</b>  | <b>MH290026</b> | <b>MH290031</b> | <b>MH290036</b> |
| <b><i>Helicotubeufia jonesii</i></b>       | <b>MFLUCC 17-0043 *</b> | <b>MH290020</b>  | <b>MH290025</b> | <b>MH290030</b> | <b>MH290035</b> |

|                                               |                         |                 |                 |                 |                 |
|-----------------------------------------------|-------------------------|-----------------|-----------------|-----------------|-----------------|
| <i>Kamalomyces mangrovei</i>                  | MFLUCC 17-0407          | MN047097        | MN017863        | MN077072        | /               |
| <b><i>Kamalomyces thailandicus</i></b>        | <b>MFLUCC 13-0233 *</b> | <b>MF506884</b> | <b>MF506882</b> | <b>MF506886</b> | /               |
| <i>Kamalomyces thailandicus</i>               | MFLUCC 11-0158          | MF506883        | MF506881        | MF506885        | MF506887        |
| <i>Kevinyhydea brevistipitata</i>             | MFLUCC 18-1269          | MH747102        | MH747115        | /               | /               |
| <i>Manoharachariella tectonae</i>             | MFLUCC 12-0170          | KU144935        | KU764705        | KU872762        | /               |
| <b><i>Muripulchra aquatica</i></b>            | <b>KUMCC 15-0276 *</b>  | <b>KY320534</b> | <b>KY320551</b> | <b>KY320564</b> | <b>MH551058</b> |
| <b><i>Muripulchra aquatica</i></b>            | <b>KUMCC 15-0245 *</b>  | <b>KY320533</b> | <b>KY320550</b> | <b>KY320563</b> | <b>MH551057</b> |
| <i>Neocanthostigma fusiforme</i>              | MFLUCC 11-0510          | KF301529        | KF301537        | /               | /               |
| <b><i>Neochlamydotubeufia fusiformis</i></b>  | <b>MFLUCC 16-0016 *</b> | <b>MH558740</b> | <b>MH558865</b> | <b>MH550931</b> | <b>MH551059</b> |
| <i>Neochlamydotubeufia khunkornensis</i>      | MFLUCC 16-1126          | MH558743        | MH558868        | MH550934        | MH551062        |
| <i>Neohelicoma fagacearum</i>                 | MFLUCC110379            | KF301524        | KF301532        | KF301553        | /               |
| <i>Neohelicomyces aquaticus</i>               | KUMCC 15-0463           | KY320529        | KY320546        | KY320562        | MH551065        |
| <b><i>Neohelicomyces aquaticus</i></b>        | <b>MFLUCC 16-0993 *</b> | <b>KY320528</b> | <b>KY320545</b> | <b>KY320561</b> | <b>MH551066</b> |
| <b><i>Neohelicomyces dehongensis</i></b>      | <b>MFLUCC 18-1029 *</b> | <b>MT627701</b> | <b>MN913709</b> | <b>MT954393</b> | /               |
| <b><i>Neohelicomyces hyalosporus</i></b>      | <b>GZCC 16-0086 *</b>   | <b>MH558745</b> | <b>MH558870</b> | <b>MH550936</b> | <b>MH551064</b> |
| <b><i>Neohelicosporium acrogenisporum</i></b> | <b>MFLUCC 17-2019 *</b> | <b>MH558746</b> | <b>MH558871</b> | <b>MH550937</b> | <b>MH551069</b> |
| <i>Neohelicosporium aquaticum</i>             | MFLUCC 17-1519          | MF467916        | MF467929        | MF535242        | MF535272        |
| <b><i>Neohelicosporium astrictum</i></b>      | <b>MFLUCC 17-2004 *</b> | <b>MH558747</b> | <b>MH558872</b> | <b>MH550938</b> | <b>MH551070</b> |
| <b><i>Neohelicosporium ellipsoideum</i></b>   | <b>MFLUCC 16-0229 *</b> | <b>MH558748</b> | <b>MH558873</b> | <b>MH550939</b> | <b>MH551071</b> |
| <i>Neohelicosporium fusisporum</i>            | MFUCC 16-0642           | MG017612        | MG017613        | MG017614        | /               |
| <i>Neohelicosporium guangxiense</i>           | GZCC 16-0068            | MH558749        | MH558874        | MH550940        | MH551072        |
| <i>Neohelicosporium guangxiense</i>           | MFLUCC 17-0054          | MH558750        | MH558875        | MH550941        | MH551073        |
| <b><i>Neohelicosporium hyalosporum</i></b>    | <b>GZCC 16-0076 *</b>   | <b>MF467923</b> | <b>MF467936</b> | <b>MF535249</b> | <b>MF535279</b> |
| <b><i>Neohelicosporium irregulare</i></b>     | <b>MFLUCC 17-1796 *</b> | <b>MH558752</b> | <b>MH558877</b> | <b>MH550943</b> | <b>MH551075</b> |
| <b><i>Neohelicosporium krabiense</i></b>      | <b>MFLUCC 16-0224 *</b> | <b>MH558754</b> | <b>MH558879</b> | <b>MH550945</b> | <b>MH551077</b> |

|                                        |                          |                 |                 |                 |                 |
|----------------------------------------|--------------------------|-----------------|-----------------|-----------------|-----------------|
| <i>Neohelicosporium laxisporum</i>     | <b>MFLUCC 17-2027 *</b>  | <b>MH558755</b> | <b>MH558880</b> | <b>MH550946</b> | <b>MH551078</b> |
| <i>Neohelicosporium ovoideum</i>       | <b>GZCC 16-0064 *</b>    | <b>MH558756</b> | <b>MH558881</b> | <b>MH550947</b> | <b>MH551079</b> |
| <i>Neohelicosporium parvisporum</i>    | MFLUCC 16-0218           | MF467927        | MF467940        | MH550955        | MH551087        |
| <i>Neohelicosporium parvisporum</i>    | MFLUCC 17-1521           | MH558758        | MH558883        | MH550949        | MH551081        |
| <i>Neohelicosporium parvisporum</i>    | MFLUCC 17-1804           | MH558760        | MH558885        | MH550951        | MH551083        |
| <i>Neohelicosporium thailandicum</i>   | <b>MFLUCC 16-0221 *</b>  | <b>MF467928</b> | <b>MF467941</b> | <b>MF535253</b> | <b>MF535283</b> |
| <i>Neotubeufia krabiensis</i>          | <b>MFLUCC 16-1125 *</b>  | <b>MG012031</b> | <b>MG012024</b> | <b>MG012010</b> | <b>MG012017</b> |
| <i>Parahelicomyces paludosus</i>       | AR 4206                  | DQ341095        | DQ341103        | /               | /               |
| <i>Parahelicomyces quercus</i>         | <b>MFUCC 17-0895 *</b>   | <b>MK347720</b> | <b>MK347934</b> | <b>MK360077</b> | <b>MK434906</b> |
| <i>Pleurohelicosporium parvisporum</i> | <b>MFLU 17-1124 *</b>    | <b>MH558764</b> | <b>MH558889</b> | <b>MH550956</b> | <b>MH551088</b> |
| <i>Podonectria kuwanaspidis</i>        | SICAUCC 21-0007          | MW484994        | MW462905        | MW462116        | MW462123        |
| <i>Podonectria kuwanaspidis</i>        | <b>SICAUCC 21-0002 *</b> | <b>MW484989</b> | <b>MW462900</b> | <b>MW462112</b> | <b>MW462119</b> |
| <i>Podonectria novae-zelandiae</i>     | SICAUCC 21-0005          | MW484992        | MW462903        | MW462115        | MW462122        |
| <i>Podonectria sichuanensis</i>        | SICAUCC 21-0001          | MW484988        | MW462899        | MW462111        | MW462118        |
| <i>Pseudohelicomyces aquaticus</i>     | <b>MFLUCC 16-0234 *</b>  | <b>MH558766</b> | <b>MH558891</b> | <b>MH550958</b> | <b>MH551092</b> |
| <i>Pseudohelicomyces talbotii</i>      | <b>MFLUCC 17-2021 *</b>  | <b>MH558765</b> | <b>MH558890</b> | <b>MH550957</b> | <b>MH551091</b> |
| <i>Pseudohelicoon gigantisporum</i>    | BCC 3550                 | AY916467        | AY856904        | /               | /               |
| <i>Tamhinispora indica</i>             | <b>NFCCI 2924 *</b>      | <b>KC469282</b> | <b>KC469283</b> | /               | /               |
| <i>Tamhinispora srinivasanii</i>       | NFCCI 4231               | MG763746        | MG763745        | /               | /               |
| <i>Thaxteriella amazonensis</i>        | ATCC 42524               | AY916458        | AY787938        | /               | /               |
| <i>Thaxteriella inthanonensis</i>      | <b>MFLUCC11-0003 *</b>   | <b>JN865211</b> | <b>JN865199</b> | /               | /               |
| <i>Thaxteriellopsis lignicola</i>      | MFLUCC 16-0026           | MH558768        | MH558893        | MH550960        | MH551094        |
| <i>Thaxteriellopsis lignicola</i>      | MFLUCC 16-0024           | MH558767        | MH558892        | MH550959        | MH551093        |
| <i>Tubeufia abundata</i>               | <b>MFLUCC 17-2024 *</b>  | <b>MH558769</b> | <b>MH558894</b> | <b>MH550961</b> | <b>MH551095</b> |
| <i>Tubeufia aquatica</i>               | MFLUCC 15-0990           | MT627687        | MN913689        | MT954399        | MT878463        |

|                                       |                         |                  |                 |                 |                 |
|---------------------------------------|-------------------------|------------------|-----------------|-----------------|-----------------|
| <i>Tubeufia aquatica</i>              | MFLUCC 17-1794          | MH558770         | MH558895        | MH550962        | MH551096        |
| <b><i>Tubeufia bambusicola</i></b>    | <b>MFLUCC 17-1803 *</b> | <b>MH558771</b>  | <b>MH558896</b> | <b>MH550963</b> | <b>MH551097</b> |
| <b><i>Tubeufia brunnea</i></b>        | <b>MFLUCC 17-2022 *</b> | <b>MH558773</b>  | <b>MH558898</b> | <b>MH550965</b> | <b>MH551099</b> |
| <i>Tubeufia Chiangmaiensis</i>        | MFLUCC 17-1801          | MH558774         | MH558899        | MH550966        | MH551100        |
| <i>Tubeufia cylindrothecia</i>        | MFLUCC 17-1792          | MH558776         | MH558901        | MH550968        | MH551102        |
| <b><i>Tubeufia dictyospora</i></b>    | <b>MFLUCC 17-1805 *</b> | <b>MH558778</b>  | <b>MH558903</b> | <b>MH550970</b> | <b>MH551104</b> |
| <b><i>Tubeufia fangchengensis</i></b> | <b>MFLUCC 17-0047 *</b> | <b>MH558783</b>  | <b>MH558908</b> | <b>MH550975</b> | <b>MH551109</b> |
| <i>Tubeufia filiformis</i>            | MFLUCC 16-1135          | KY092416         | KY092411        | KY117032        | MF535285        |
| <b><i>Tubeufia hechiensis</i></b>     | <b>MFLUCC 17-0052 *</b> | <b>MH558785</b>  | <b>MH558910</b> | <b>MH550978</b> | <b>MH551112</b> |
| <i>Tubeufia krabiensis</i>            | MFLUCC 16-0324          | MH275090         | MH260324        | MH412787        | MH412761        |
| <b><i>Tubeufia latispora</i></b>      | <b>MFLUCC 16-0027 *</b> | <b>KY092417</b>  | <b>KY092412</b> | <b>KY117033</b> | <b>MH551119</b> |
| <i>Tubeufia laxispora</i>             | MFLUCC 17-2023          | MH558794         | MH558919        | MH550987        | MH551121        |
| <b><i>Tubeufia machaerinae</i></b>    | <b>MFLUCC 17-0055 *</b> | <b>MH558795</b>  | <b>MH558920</b> | <b>MH550988</b> | <b>MH551122</b> |
| <b><i>Tubeufia mackenziei</i></b>     | <b>MFLUCC 16-0222 *</b> | <b>KY092415</b>  | <b>KY092410</b> | <b>KY117031</b> | <b>MF535288</b> |
| <i>Tubeufia parvispora</i>            | MFLUCC 17-2009          | MH558798         | MH558923        | MH550991        | MH551125        |
| <i>Tubeufia parvispora</i>            | MFLUCC 17-1992          | MH558796         | MH558921        | MH550989        | MH551123        |
| <i>Tubeufia roseohelicospora</i>      | MFLUCC 17-1797          | MH558800         | MH558925        | MH550993        | MH551127        |
| <b><i>Tubeufia tectonae</i></b>       | <b>MFLUCC 17-1985 *</b> | <b>MH558810</b>  | <b>MH558934</b> | <b>MH551003</b> | <b>MH551137</b> |
| <b><i>Tubeufia tratensis</i></b>      | <b>MFLUCC 17-1993 *</b> | <b>NR_160398</b> | <b>MH558935</b> | <b>MH551004</b> | <b>MH551138</b> |
| <i>Tubeufiaceae</i> sp.               | UBC F14999              | AY916456         | AY856870        | /               | /               |

**Table S3.** The names, isolate numbers, and corresponding GenBank accession numbers of the taxa used in Figure 5. The taxa produced in this study are indicated in red, and the type strains are indicated in bold with “\*”

| Species                                | Strain             | GenBank accession No. |           |
|----------------------------------------|--------------------|-----------------------|-----------|
|                                        |                    | ITS                   | LSU       |
| <i>Brunneocarpos banksiae</i>          | CPC 29841 *        | NR_147648             | NG_066277 |
| <i>Caliciopsis indica</i>              | GUFCC 4947 *       | GQ259981              | GQ259980  |
| <i>Chaenothecopsis consociata</i>      | Tibell 22472       | AY795851              | DQ008999  |
| <i>Chaenothecopsis debilis</i>         | Tibell 16643       | AY795852              | AY795991  |
| <i>Chaenothecopsis diabolica</i>       | H:Tuovila 06-035 * | JX119109              | JX119118  |
| <i>Chaenothecopsis dolichocephala</i>  | Tibell 19281 *     | AY795854              | AY795993  |
| <i>Chaenothecopsis epithallina</i>     | Tibell 22705       | AY795855              | /         |
| <i>Chaenothecopsis fennica</i>         | Tibell 16024       | AY795857              | AY795995  |
| <i>Chaenothecopsis golubkovae</i>      | Titov 6707 *       | AY795859              | AY795996  |
| <i>Chaenothecopsis haematopus</i>      | CBS:173.95         | MH862507              | MH874148  |
| <i>Chaenothecopsis haematopus</i>      | 16625              | AY795861              | AY795997  |
| <i>Chaenothecopsis hongheensis</i>     | HKAS 122672        | OQ379009              | OQ379420  |
| <i>Chaenothecopsis hongheensis</i>     | HKAS 122673 *      | OQ379010              | OQ379421  |
| <i>Chaenothecopsis khayensis</i>       | H:JR 04G058 *      | JX122785              | HQ172895  |
| <i>Chaenothecopsis matai</i>           | PDD 110746         | OQ308931              | OQ308874  |
| <i>Chaenothecopsis matai</i>           | PDD 110749 *       | OQ308932              | OQ308875  |
| <i>Chaenothecopsis montana</i>         | H:Tuovila 07-086 * | JX119105              | JX119114  |
| <i>Chaenothecopsis nana</i>            | Tibell 22473 *     | AY795862              | /         |
| <i>Chaenothecopsis neocaledonica</i>   | Rikkinen 010179 *  | KF815196              | KF815197  |
| <i>Chaenothecopsis nigripunctata</i>   | H:Tuovila 06-013 * | JX119103              | JX119112  |
| <i>Chaenothecopsis nodosa</i>          | PDD 110743         | OQ308933              | OQ308876  |
| <i>Chaenothecopsis nodosa</i>          | PDD 110745 *       | OQ308934              | OQ308877  |
| <i>Chaenothecopsis novae-zelandiae</i> | PDD 110742         | OQ308935              | OQ308878  |
| <i>Chaenothecopsis novae-zelandiae</i> | PDD 110744 *       | OQ308936              | OQ308879  |
| <i>Chaenothecopsis pallida</i>         | H:JR 10652 *       | JX122779              | JX122781  |
| <i>Chaenothecopsis pusilla</i>         | Tibell 1658        | /                     | DQ009000  |
| <i>Chaenothecopsis pusiola</i>         | H:Tuovila 09-047   | JX119106              | JX119115  |
| <i>Chaenothecopsis quintralis</i>      | BCRU:05233 *       | /                     | JQ267741  |
| <i>Chaenothecopsis resinicola</i>      | Tibell 19234 *     | AY795867              | /         |
| <i>Chaenothecopsis resinophila</i>     | H:JR 000424 *      | JX122780              | JX122782  |
| <i>Chaenothecopsis schefflerae</i>     | Rikkinen 13183     | KY499965              | KY499967  |
| <i>Chaenothecopsis sitchensis</i>      | H:Tuovila 06-033 * | JX119102              | JX119111  |
| <i>Chaenothecopsis sp. 1</i>           | Tuovila 09-052     | JX119110              | JX119119  |
| <i>Chaenothecopsis sp. 2</i>           | Tuovila 08-004     | KC590480              | KC590485  |
| <i>Chaenothecopsis tsugae</i>          | H:JR07005B         | JX119104              | JX119113  |
| <i>Chaenothecopsis vainioana</i>       | H:Tuovila 09-066   | JX119107              | JX119116  |
| <i>Chaenothecopsis viridireagens</i>   | Tibell 22803       | AY795872              | DQ013257  |

|                                               |                         |                 |                 |
|-----------------------------------------------|-------------------------|-----------------|-----------------|
| <i>Mycocalicium albonigrum</i>                | Tibell 19038            | AF223966        | AY796001        |
| <b><i>Mycocalicium hyaloparvicellulum</i></b> | <b>MFLUCC 14-0169 *</b> | <b>KR920004</b> | <b>KR920005</b> |
| <b><i>Mycocalicium sequoiae</i></b>           | <b>Rikkinen 92055 *</b> | /               | <b>AY796002</b> |
| <i>Mycocalicium sp. 2</i>                     | Tuovila 09-131          | KC590482        | KC590487        |
| <i>Mycocalicium sp.1</i>                      | Tibell 17604            | AF243133        | /               |
| <i>Mycocalicium subtile</i>                   | Tibell 21020            | AF225445        | AY796003        |
| <i>Mycocalicium subtile</i>                   | JR6450                  | OQ308930        | OQ308873        |
| <i>Phaeocalicium interruptum</i>              | Tibell 23044            | AY795873        | /               |
| <i>Phaeocalicium polyporaeum</i>              | ZW-Geo60-Clark          | AY789363        | AY789362        |
| <i>Phaeocalicium populneum</i>                | Tibell 19286            | AY795874        | AY796009        |
| <i>Phaeocalicium praecedens</i>               | Tuovila 09-240          | KC590481        | KC590486        |
| <i>Phaeocalicium sp.</i>                      | Tuovila 10-017          | KC590483        | KC590484        |
| <b><i>Phaeocalicium triseptatum</i></b>       | <b>L280 *</b>           | <b>KJ871615</b> | /               |
| <i>Rhopalophora clavispora</i>                | CBS 129.74              | KX537751        | MH872573        |
| <b><i>Sphinctrina intermedia</i></b>          | <b>L281 *</b>           | <b>KJ865747</b> | /               |
| <i>Sphinctrina leucopoda</i>                  | Kalb 33829              | AY795875        | AY796006        |
| <i>Sphinctrina turbinata</i>                  | Tibell 22478            | AY795876        | AY796007        |
| <i>Sphinctrina turbinata</i>                  | Tibell 23093            | AY795877        | DQ009001        |
| <i>Stenocybe pullatula</i>                    | Tibell 17117            | AY795878        | AY796008        |

**Table S4. The names, isolate numbers, and corresponding GenBank accession numbers of the taxa used in Figure 7. The taxa produced in this study are indicated in red, and the type strains are indicated in bold with “\*”.**

| Species name                              | Strain            | GenBank accession No. |                 |
|-------------------------------------------|-------------------|-----------------------|-----------------|
|                                           |                   | ITS                   | tub2            |
| <i>Camarops amorphia</i>                  | SMH1450           | AY780054              | AY780093        |
| <i>Camarops petersii</i>                  | JM1655            | AY346265              | AY780094        |
| <i>Camarops tubulina</i>                  | SMH4614           | AY346266              | AY780095        |
| <i>Camarops ustulinoides</i>              | SMH1988           | AY346267              | AY780096        |
| <b><i>Chaetosphaeria biapiculata</i></b>  | <b>SMH 3074 *</b> | <b>AF466065</b>       | <b>AF466026</b> |
| <i>Chaetosphaeria cubensis</i>            | SMH 3258          | AF466067              | AF466028        |
| <i>Chaetosphaeria decastyla</i>           | SMH 2629          | AF466068              | AF466029        |
| <i>Chaetosphaeria hebetiseta</i>          | SMH 2729          | AF466069              | AF466030        |
| <i>Chaetosphaeria innumera</i>            | SMH 2748          | AY017375              | AF466018        |
| <i>Chaetosphaeria lignomollis</i>         | SMH 3015          | AF466073              | AF466034        |
| <i>Chaetosphaeria longiseta</i>           | SMH 3854          | AF279417              | AF466036        |
| <b><i>Chaetosphaeria luquillensis</i></b> | <b>SMH 2973 *</b> | <b>AF466074</b>       | <b>AF466037</b> |
| <i>Chaetosphaeria minuta</i>              | SMH 3396          | AF466075              | AF466038        |
| <i>Chaetosphaeria ovoidea</i>             | SMH2605           | AF064641              | AF466057        |
| <i>Chaetosphaeria pygmaea</i>             | UPSC 2523         | AF466077              | AF466040        |

|                                              |                       |                 |                 |
|----------------------------------------------|-----------------------|-----------------|-----------------|
| <i>Coniochaetidium savoryi</i>               | TRTC 51980            | AY346276        | AY780114        |
| <i>Diaporthe phaseolorum</i>                 | FAU458                | AY346279        | AY780115        |
| <i>Echinosphaeria canescens</i>              | JHC97-006             | KF765604        | KF765622        |
| <i>Echinosphaeria canescens</i>              | SMH4666               | KF765605        | KF765623        |
| <i>Echinosphaeria canescens</i>              | SMH4791               | AY436403        | /               |
| <i>Echinosphaeria canescens</i>              | TL5730                | AY436404        | KF765624        |
| <i>Eutypa</i> sp.                            | SMH3580               | AY346280        | AY780117        |
| <i>Fusarium ambrosium</i>                    | SMH1999               | AY780077        | AY780137        |
| <i>Helminthosphaeria carpathica</i>          | SMH3903               | KF765606        | KF765625        |
| <i>Helminthosphaeria cf. stuppea</i>         | JF04120               | KF765611        | KF765632        |
| <b><i>Helminthosphaeria cf. stuppea</i></b>  | <b>TL11998 *</b>      | <b>KF765612</b> | <b>KF765633</b> |
| <b><i>Helminthosphaeria clavariarum</i></b>  | <b>ANM Acc.17 *</b>   | /               | <b>KF765626</b> |
| <i>Helminthosphaeria corticiorum</i>         | JF04225               | KF765607        | KF765627        |
| <b><i>Helminthosphaeria hispidissima</i></b> | <b>ILLS00121145 *</b> | <b>MN447129</b> | /               |
| <i>Helminthosphaeria hyphodermiae</i>        | SMH4192               | KF765608        | KF765628        |
| <b><i>Helminthosphaeria ludens</i></b>       | <b>JF04126 *</b>      | /               | <b>KF765629</b> |
| <i>Helminthosphaeria mammillata</i>          | ANM986                | KF765609        | KF765630        |
| <i>Helminthosphaeria odontiae</i>            | ANM928                | KF765610        | KF765631        |
| <b><i>Helminthosphaeria tomaculum</i></b>    | <b>SMH2485 *</b>      | <b>KF765613</b> | <b>KF765634</b> |
| <b><i>Helminthosphaeria triseptata</i></b>   | <b>JF02048 *</b>      | /               | <b>KF765635</b> |
| <i>Helminthosphaeria triseptata</i>          | JF04015               | KF765614        | KF765636        |
| <b><i>Hilberina caudata</i></b>              | <b>SMH1542 *</b>      | <b>KF765615</b> | <b>KF765637</b> |
| <b><i>Hilberina hongheensis</i></b>          | <b>HKAS 122677 *</b>  | <b>OQ379011</b> | <b>OQ379003</b> |
| <i>Hilberina hongheensis</i>                 | HKAS 122678           | OQ379012        | OQ379004        |
| <i>Hilberina munkii</i>                      | SMH1531               | KF765616        | KF765638        |
| <b><i>Hilberina punctata</i></b>             | <b>SMH4825 *</b>      | /               | <b>KF765639</b> |
| <b><i>Hilberina robusta</i></b>              | <b>SMH3054 *</b>      | /               | <b>KF765640</b> |
| <b><i>Hilberina sphagnum</i></b>             | <b>Buck49156 *</b>    | <b>KF765617</b> | <b>KF765641</b> |
| <b><i>Lasiosphaeria ovina</i></b>            | <b>SMH1538 *</b>      | <b>AF064643</b> | <b>AF466046</b> |
| <i>Melanochaeta aotearoae</i>                | SMH 3551              | AF466082        | AF466048        |
| <b><i>Melanochaeta hemipsila</i></b>         | <b>SMH2125 *</b>      | <b>AY346292</b> | <b>AF466049</b> |
| <i>Neurospora crassa</i>                     | MUCL 19026            | AF286411        | M13630          |
| <b><i>Poroconiochaeta discoidea</i></b>      | <b>SANK 12878 *</b>   | <b>AY346297</b> | <b>AY780134</b> |
| <i>Ruzenia spermoides</i>                    | ANM163                | KF765618        | KF765642        |
| <i>Ruzenia spermoides</i>                    | SMH4606               | AY436422        | KF765644        |
| <i>Ruzenia spermoides</i>                    | SMH4655               | KF765619        | KF765645        |
| <i>Synaptospora plumbea</i>                  | ANM963                | KF765620        | KF765646        |
| <i>Synaptospora plumbea</i>                  | SMH3962               | KF765621        | KF765647        |
| <i>Valsa ceratosperma</i>                    | AR3426                | AF408387        | AY780144        |
| <b><i>Valsonectria pulchella</i></b>         | <b>SMH1193 *</b>      | <b>AY346304</b> | <b>AY780145</b> |

**Table S5.** The names, isolate numbers, and corresponding GenBank accession numbers of the taxa used in Figure 9. The taxa produced in this study are indicated in red, and the type strains are indicated in bold with “\*”

| Species                                | Strain                  | GenBank accession No. |                 |                 |
|----------------------------------------|-------------------------|-----------------------|-----------------|-----------------|
|                                        |                         | ITS                   | LSU             | <i>rpb2</i>     |
| <i>Amphibambusa bambusicola</i>        | <b>MFLUCC 11-0617 *</b> | <b>KP744433</b>       | <b>KP744474</b> | /               |
| <i>Amphibambusa hongheensis</i>        | <b>KUMCC 20-0334</b>    | <b>MW892972</b>       | <b>MW892970</b> | /               |
| <i>Arecophila bambusae</i>             | HKUCC 4794              | /                     | AF452038        | /               |
| <i>Arecophila muroiana</i>             | GZUCC0122               | MT742127              | MT742134        | /               |
| <i>Biscogniauxia capnodes</i>          | YMJ 138                 | EF026131              | /               | JX507779        |
| <b><i>Biscogniauxia nummularia</i></b> | <b>MUCL 51395 *</b>     | <b>JX658444</b>       | <b>KT281894</b> | <b>KY624236</b> |
| <i>Biscogniauxia petrensis</i>         | LC5697                  | KU746669              | KU746715        | /               |
| <i>Cainia graminis</i>                 | CBS 136.62              | MH858123              | MH869701        | /               |
| <i>Cainia</i> sp.                      | LSU0560                 | MT000421              | MT000513        | /               |
| <b><i>Delonicicola siamense</i></b>    | <b>MFLUCC 15-0670 *</b> | <b>MF167586</b>       | <b>MF158345</b> | <b>MF158346</b> |
| <i>Delonicicola siamense</i>           | <b>KUMCC 21-0459</b>    | <b>OQ379013</b>       | <b>OQ379424</b> | <b>OQ378992</b> |
| <b><i>Discula destructiva</i></b>      | <b>ATCC 76230</b>       | <b>DQ323528</b>       | <b>AF362568</b> | /               |
| <i>Graphostroma platystoma</i>         | AFTOL-ID 1249           | /                     | DQ836906        | DQ836893        |
| <i>Kretzschmaria deusta</i>            | CBS163.93               | KC477237              | KY610458        | /               |
| <b><i>Liberomyces macrosporus</i></b>  | <b>CCF 4028 *</b>       | <b>NR_154605</b>      | /               | <b>FR715509</b> |
| <i>Liberomyces pistaciae</i>           | CPC 33866               | MH797616              | /               | MH797684        |
| <i>Liberomyces saliciphilus</i>        | H041                    | FR715510              | /               | FR715507        |
| <i>Obolarina dryophila</i>             | 8401 = H86              | /                     | GQ428313        | FR715505        |
| <i>Podosordaria tulasnei</i>           | CBS 128.80              | KT281902              | KT281897        | /               |
| <i>Seynesia erumpens</i>               | SMH 1291                | /                     | AF279410        | AY641073        |
| <i>Xylaria hypoxylon</i>               | ATCC 42768              | AY327477              | AY327480        | /               |



**Table S6. The names, isolate numbers, and corresponding GenBank accession numbers of the taxa used in Figure 11. The taxa produced in this study are indicated in red, and the type strains are indicated in bold with “\*”**

| Species                                       | Strain           | GenBank accession No. |                 |                 |
|-----------------------------------------------|------------------|-----------------------|-----------------|-----------------|
|                                               |                  | LSU                   | <i>tef1-a</i>   | <i>rpb2</i>     |
| <i>Acanthonitschkea argentinensis</i>         | SMH1395          | AY695259              | FJ969042        | FJ968943        |
| <i>Acanthonitschkea tristis</i>               | SMH4723          | FJ968949              | FJ969043        | /               |
| <b><i>Bertia gigantospora</i></b>             | <b>GKM1136 *</b> | /                     | <b>FJ969008</b> | <b>FJ968937</b> |
| <b><i>Bertia orbis</i></b>                    | <b>GKM1271 *</b> | <b>FJ968955</b>       | <b>FJ969009</b> | /               |
| <i>Chaetosphaerella phaeostroma</i>           | SMH4585          | AY346274              | FJ969003        | /               |
| <i>Chaetosphaerella phaeostroma</i>           | SMH4257          | AY695264              | FJ969004        | FJ968940        |
| <i>Coronophora gregaria</i>                   | ANM1555          | /                     | FJ969007        | FJ968938        |
| <b><i>Coronophorella chaetomioides</i></b>    | <b>GKM1099 *</b> | <b>FJ968969</b>       | <b>FJ969034</b> | <b>FJ968922</b> |
| <b><i>Cryptosphaerella celata</i></b>         | <b>GKM1231 *</b> | <b>FJ968975</b>       | <b>FJ969035</b> | <b>FJ968929</b> |
| <b><i>Cryptosphaerella costaricensis</i></b>  | <b>MO2111 *</b>  | <b>FJ968971</b>       | <b>FJ969028</b> | /               |
| <i>Cryptosphaerella cylindriformis</i>        | GKM1042          | FJ968973              | FJ969032        | FJ968918        |
| <i>Cryptosphaerella cylindriformis</i>        | GKM1187          | GQ217531              | FJ969033        | FJ968925        |
| <b><i>Cryptosphaerella cylindriformis</i></b> | <b>GKM434N *</b> | <b>FJ968972</b>       | <b>FJ969031</b> | <b>FJ968934</b> |
| <b><i>Cryptosphaerella elliptica</i></b>      | <b>SMH4722 *</b> | <b>FJ968974</b>       | <b>FJ969029</b> | <b>FJ968944</b> |
| <b><i>Cryptosphaerella globosa</i></b>        | <b>GKM471N *</b> | <b>FJ968977</b>       | <b>FJ969036</b> | <b>FJ968935</b> |
| <b><i>Cryptosphaerella malindensis</i></b>    | <b>GKM1150 *</b> | <b>FJ968970</b>       | <b>FJ969027</b> | <b>FJ968923</b> |
| <i>Euacanthofoveolata</i>                     | GKM1221          | FJ968978              | FJ969026        | FJ968927        |
| <i>Fracchiaria broomeana</i>                  | GKM1071          | /                     | FJ969040        | FJ968919        |
| <i>Fracchiaria broomeana</i>                  | SMH347           | FJ968979              | FJ969041        | FJ968947        |
| <i>Fracchiaria broomeana</i>                  | SMH2809          | AY695268              | FJ969039        | FJ968942        |

|                                      |                    |                 |          |          |
|--------------------------------------|--------------------|-----------------|----------|----------|
| <i>Fracchiacea lunata</i>            | GKM1089            | /               | FJ969005 | FJ968921 |
| <b><i>Fracchiacea myricoides</i></b> | <b>IFRD 9201 *</b> | <b>KX856174</b> | /        | /        |
| <i>Fracchiacea myricoides</i>        | HKAS 122671        | OQ379425        | OQ378999 | OQ378993 |
| <i>Neofracchiacea callista</i>       | SMH2689            | AY695269        | FJ969020 | FJ968941 |
| <i>Nitschkia menicoidea</i>          | SMH1523            | AY695270        | /        | /        |
| <i>Nitschkia tetraspora</i>          | SMH4787            | FJ968984        | FJ969010 | /        |
| <i>Nitschkia tetraspora</i>          | GKML213N           | FJ968985        | /        | /        |
| <i>Nitschkia tetraspora</i>          | SMH2469.2          | FJ968986        | /        | /        |
| <i>Scortechinia acanthostroma</i>    | SMH1164            | FJ968989        | FJ969014 | FJ968924 |
| <i>Scortechinia acanthostroma</i>    | SMH1143            | FJ968988        | FJ969012 | FJ968948 |
| <i>Tympanopsis confertula</i>        | GKM1242            | FJ968997        | FJ969023 | FJ968930 |
| <i>Tympanopsis confertula</i>        | ANM1567            | FJ969001        | FJ969025 | FJ968939 |
| <i>Tympanopsis confertula</i>        | SMH4841            | FJ968998        | FJ969024 | FJ968946 |
| <i>Tympanopsis uniseriata</i>        | GKM1203            | FJ968999        | FJ969016 | FJ968926 |
| <i>Tympanopsis uniseriata</i>        | GKM1228            | FJ969000        | FJ969017 | FJ968928 |

**Table S7. The names, isolate numbers, and corresponding GenBank accession numbers of the taxa used in Figure 13. The taxa produced in this study are indicated in red, and the type strains are indicated in bold with “\*”**

| Species name                               | Strain                  | GenBank accession No. |                 |                  |                 |
|--------------------------------------------|-------------------------|-----------------------|-----------------|------------------|-----------------|
|                                            |                         | ITS                   | LSU             | SSU              | <i>tefl-a</i>   |
| <i>Acrocordia subglobosa</i>               | HTL940                  | /                     | JN887392        | JN887373         | JN887417        |
| <i>Anisomeridium</i> cf. <i>willeyanum</i> | MPN549                  | /                     | JN887393        | /                | /               |
| <i>Anisomeridium phaeospermum</i>          | MPN539                  | /                     | JN887394        | JN887374         | /               |
| <i>Anisomeridium</i> sp.                   | MPN533                  | /                     | JN887395        | JN887375         | JN887419        |
| <i>Anisomeridium</i> sp.                   | MPN540                  | /                     | JN887397        | JN887377         | JN887420        |
| <i>Anisomeridium</i> sp.                   | MPN534                  | /                     | JN887396        | JN887376         | /               |
| <i>Anisomeridium</i> sp.                   | MPN542                  | /                     | JN887398        | JN887378         | /               |
| <i>Anisomeridium ubianum</i>               | MPN94                   | /                     | GU327709        | JN887379         | /               |
| <b><i>Elsinoe centrolobii</i></b>          | <b>CBS 222.50 *</b>     | <b>NR_148132</b>      | <b>KX886969</b> | <b>NG_062717</b> | <b>DQ677934</b> |
| <b><i>Elsinoe phaseoli</i></b>             | <b>CBS 165.31 *</b>     | <b>NR_148161</b>      | <b>DQ678095</b> | <b>NG_062718</b> | <b>DQ677935</b> |
| <b><i>Eriomyces heveae</i></b>             | <b>MFLUCC 17-2232 *</b> | <b>NR_169673</b>      | <b>MH109524</b> | /                | /               |
| <i>Heleiosa barbatula</i>                  | JK 5548I                | /                     | GU479787        | GU479753         | /               |
| <b><i>Heleiosa barbatula</i></b>           | <b>HKAS 122668</b>      | <b>OQ379015</b>       | <b>OQ379426</b> | <b>OQ372923</b>  | <b>OQ379000</b> |
| <i>Italiotremis phillyreae</i>             | CPC 35566               | MT223804              | MT223899        | /                | /               |
| <i>Megalotremis verrucosa</i>              | Lucking 26316           | /                     | GU327718        | JN887383         | /               |
| <i>Myriangium hispanicum</i>               | CBS 247.33              | KX887304              | GU301854        | GU296180         | GU349055        |
| <i>Neoheliosia lincangensis</i>            | HKAS 111911             | MW424766              | MW424781        | MW424796         | MW430102        |
| <i>Neoheliosia lincangensis</i>            | HKAS 111912             | MW424765              | MW424780        | MW424795         | MW430101        |
| <i>Neoheliosia lincangensis</i>            | HKAS 111913             | MW424767              | MW424782        | MW424797         | MW430103        |
| <b><i>Neoheliosia lincangensis</i></b>     | <b>HKAS 111914 *</b>    | <b>MW424764</b>       | <b>MW424779</b> | <b>MW424794</b>  | <b>MW430100</b> |

|                                 |                     |                  |                  |          |   |
|---------------------------------|---------------------|------------------|------------------|----------|---|
| <i>Pseudopassalora gouriqua</i> | <b>CBS 101954 *</b> | <b>NR_160207</b> | <b>NG_067272</b> | /        | / |
| <i>Pseudopassalora gouriqua</i> | CPC 1811            | /                | JN712565         | /        | / |
| <i>Trypetheliopsis kalbii</i>   | MPN243              | /                | JN887406         | JN887391 | / |

**Table S8. The names, isolate numbers, and corresponding GenBank accession numbers of the taxa used in Figure 15. The taxa produced in this study are indicated in red, and the type strains are indicated in bold with “\*”**

| Species                                                   | Strain                  | GenBank Accession No. |                 |                 |                 |
|-----------------------------------------------------------|-------------------------|-----------------------|-----------------|-----------------|-----------------|
|                                                           |                         | ITS                   | LSU             | <i>tefl-a</i>   | <i>rpb2</i>     |
| <i>Anteaglonium globosum</i>                              | <b>ANM925.2 *</b>       | /                     | <b>GQ221879</b> | <b>GQ221925</b> | /               |
| <i>Anteaglonium parvulum</i>                              | <b>MFLUCC 14-0821 *</b> | /                     | <b>KU922915</b> | <b>KU922921</b> | /               |
| <i>Hermatomyces amphispurus</i>                           | ILLS 82999              | LR812667              | /               | LR812661        | LR812672        |
| <i>Hermatomyces amphispurus</i>                           | ILLS 82998              | LR812666              | /               | LR812660        | LR812671        |
| <i>Hermatomyces amphispurus</i>                           | ILLS 82997              | LR812665              | /               | LR812659        | LR812670        |
| <i>Hermatomyces amphispurus</i>                           | ILLS 82991              | LR812662              | /               | LR812657        | LR812668        |
| <i>Hermatomyces amphispurus</i>                           | ILLS 82994              | LR812663              | /               | LR812658        | LR812669        |
| <i>Hermatomyces bauhiniae</i>                             | <b>MFLU 18-1381 *</b>   | <b>MK443382</b>       | <b>MK443378</b> | <b>MK443384</b> | <b>MK443386</b> |
| <i>Hermatomyces sphaericus</i> ( <i>H. biconisporus</i> ) | KUMCC 17-0183           | MH275063              | MH260296        | /               | /               |
| <i>Hermatomyces bifurcatus</i>                            | <b>CCF 5900 *</b>       | <b>LS398263</b>       | <b>LS398263</b> | <b>LS398417</b> | <b>LS398344</b> |
| <i>Hermatomyces bifurcatus</i>                            | CCF 5899                | LS398262              | LS398262        | LS398416        | LS398343        |
| <i>Hermatomyces krabiensis</i> ( <i>H.</i>                | MFLUCC 16-2819          | /                     | KY559394        | /               | /               |

|                                                                |                         |                 |                 |                 |                 |
|----------------------------------------------------------------|-------------------------|-----------------|-----------------|-----------------|-----------------|
| <i>chiangmaiensis</i> )                                        |                         |                 |                 |                 |                 |
| <i>Hermatomyces sphaericus</i> ( <i>H. chromolaenae</i> )      | MFLUCC 16-2817          | /               | KY559393        | /               | /               |
| <b><i>Hermatomyces clematidis</i></b>                          | <b>MFLUCC 17-2085 *</b> | <b>MT310603</b> | <b>MT214556</b> | <b>MT394735</b> | <b>MT394684</b> |
| <b><i>Hermatomyces constrictus</i></b>                         | <b>CCF 5904 *</b>       | <b>LS398264</b> | <b>LS398264</b> | <b>LS398418</b> | <b>LS398345</b> |
| <i>Hermatomyces indicus</i>                                    | MFLUCC 14-1145          | KU144922        | KU764694        | KU872756        | KU712490        |
| <i>Hermatomyces indicus</i>                                    | MFLUCC 14-1144          | KU144921        | KU764693        | KU872755        | KU712489        |
| <b><i>Hermatomyces indicus</i></b>                             | <b>MFLUCC 14-1143 *</b> | <b>KU144920</b> | <b>KU764692</b> | <b>KU872754</b> | <b>KU712488</b> |
| <i>Hermatomyces indicus</i>                                    | MFLUCC 21-0453          | OQ379016        | OQ379427        | OQ379001        | OQ378994        |
| <b><i>Hermatomyces iriomotensis</i></b>                        | <b>KT2016-1 *</b>       | <b>LC194483</b> | <b>LC194367</b> | <b>LC194394</b> | <b>LC194449</b> |
| <b><i>Hermatomyces krabiensis</i></b>                          | <b>MFLUCC 16-0249 *</b> | <b>KX525750</b> | <b>KX525742</b> | <b>KX525758</b> | <b>KX525754</b> |
| <i>Hermatomyces megasporus</i>                                 | CCF 5897                | LS398265        | /               | LS398419        | LS398346        |
| <b><i>Hermatomyces megasporus</i></b>                          | <b>CCF 5898 *</b>       | <b>LS398266</b> | <b>LS398266</b> | <b>LS398420</b> | /               |
| <b><i>Hermatomyces nabanheensis</i></b>                        | <b>KUMCC 16-0149 *</b>  | <b>KY766058</b> | <b>KY766059</b> | <b>KY766061</b> | /               |
| <i>Hermatomyces sphaericus</i> ( <i>H. pandanicola</i> )       | MFLUCC:160251           | KX525751        | KX525743        | KX525759        | KX525755        |
| <i>Hermatomyces reticulatus</i>                                | CCF 5893                | LS398267        | LS398267        | LS398421        | LS398347        |
| <i>Hermatomyces reticulatus</i>                                | CCF 5905                | LS398268        | LS398269        | LS398422        | LS398348        |
| <b><i>Hermatomyces reticulatus</i> (<i>H. subiculosus</i>)</b> | <b>MFLUCC 15-0843 *</b> | <b>KX259521</b> | <b>KX259523</b> | <b>KX259527</b> | <b>KX259529</b> |
| <i>Hermatomyces sphaericus</i> ( <i>H. saikhuensis</i> )       | MFLUCC 16-0266          | KX525748        | KX525740        | KX525756        | KX525752        |
| <i>Hermatomyces sphaericus</i> ( <i>H. saikhuensis</i> )       | MFLUCC 16-0267          | KX525749        | KX525741        | KX525757        | KX525753        |
| <i>Hermatomyces sphaericoides</i>                              | CCF 5907                | LS398272        | /               | LS398426        | /               |
| <b><i>Hermatomyces sphaericoides</i></b>                       | <b>CCF 5908 *</b>       | <b>LS398273</b> | <b>LS398273</b> | <b>LS398427</b> | <b>LS398352</b> |

|                                                       |                         |                 |                 |                 |                 |
|-------------------------------------------------------|-------------------------|-----------------|-----------------|-----------------|-----------------|
| <i>Hermatomyces sphaericoides</i>                     | KZP 470                 | LS398274        | /               | LS398428        | LS398353        |
| <i>Hermatomyces sphaericoides</i>                     | CCF 5895                | LS398270        | LS398270        | LS398424        | LS398350        |
| <i>Hermatomyces sphaericoides</i>                     | CCF 5896                | LS398271        | /               | LS398425        | LS398351        |
| <b><i>Hermatomyces sphaericus</i></b>                 | <b>MFLUCC 17-0915 *</b> | /               | /               | <b>MK360058</b> | <b>MK434868</b> |
| <i>Hermatomyces sphaericus</i>                        | CCF 5916                | LS398284        | LS398284        | LS398433        | LS398358        |
| <i>Hermatomyces sphaericus</i>                        | CCF 5894                | LS398277        | LS398277        | LS398429        | LS398354        |
| <i>Hermatomyces sphaericus</i>                        | KZP462                  | LS398287        | LS398287        | LS398434        | LS398359        |
| <i>Hermatomyces sphaericus</i>                        | CCF 5914                | LS398283        | LS398283        | LS398432        | LS398357        |
| <i>Hermatomyces sphaericus</i>                        | CCF 5911                | LS398281        | LS398281        | LS398431        | LS398356        |
| <i>Hermatomyces sphaericus</i>                        | CCF5901                 | LS398278        | /               | LS398430        | LS398355        |
| <i>Hermatomyces sphaericus</i> ( <i>H. tectonae</i> ) | MFLUCC 14-1140          | KU144917        | KU764695        | KU872757        | KU712486        |
| <i>Hermatomyces sphaericus</i> ( <i>H. tectonae</i> ) | MFLUCC 14-1141          | KU144918        | KU764696        | KU872758        | /               |
| <i>Hermatomyces sphaericus</i> ( <i>H. tectonae</i> ) | MFLUCC 14-1142          | KU144919        | KU764697        | /               | KU712487        |
| <i>Hermatomyces thailandicus</i>                      | MFLUCC 20-0114          | MT883355        | MT883353        | /               | /               |
| <i>Hermatomyces trangensis</i>                        | BCC 80742               | KY790599        | KY790601        | KY790607        | KY790605        |
| <b><i>Hermatomyces trangensis</i></b>                 | <b>BCC 80741 *</b>      | <b>KY790598</b> | <b>KY790600</b> | <b>KY790606</b> | <b>KY790604</b> |
| <i>Hermatomyces tucumanensis</i>                      | CCF 5915                | LS398290        | LS398290        | LS398437        | LS398362        |
| <i>Hermatomyces tucumanensis</i>                      | CCF 5913                | LS398289        | LS398289        | LS398436        | LS398361        |
| <i>Hermatomyces tucumanensis</i>                      | CCF 5912                | LS398288        | LS398288        | LS398435        | LS398360        |
| <i>Hermatomyces verrucosus</i>                        | CCF 5892                | LS398291        | LS398291        | LS398438        | LS398363        |
| <b><i>Hermatomyces verrucosus</i></b>                 | <b>CCF 5903 *</b>       | <b>LS398292</b> | <b>LS398292</b> | <b>LS398439</b> | <b>LS398364</b> |
